# Supplementary material
Source: MDPI journal article supplement (https://www.mdpi.com/2079-9292/10/21/2584)
Supplement: s1 [file s1 › electronics-1407388-supplementary.pdf]

# **A Flexible and Stretchable Self-powered Nanogenerator in Basketball Passing Technology Monitoring**

**Changjun Jia <sup>1</sup>, Yongsheng Zhu <sup>1</sup>, Fengxin Sun <sup>1</sup> Tianming, Zhao <sup>2</sup>, Rongda Xing <sup>3</sup>, Yupeng Mao <sup>1,\*</sup> and Chongle Zhao <sup>1,\*</sup>**

1 Physical Education Department, Northeastern University, Shenyang 110819, People's Republic of China

2 College of Sciences, Northeastern University, Shenyang 110819, People's Republic of China

3 College of information science and engineering, Northeastern University, Shenyang 110819, People's Republic of China

\* Correspondence: zhaochongle@pe.neu.edu.cn (C.Z.); maoyupeng@pe.neu.edu.cn (Y.M.)

**Table S1.** The advantages of PAAM-LiCl hydrogel compared with metal electrodes.

|                     | <b>Flexible</b> | <b>extendibility</b> | <b>transparency</b> | <b>manufacture</b> | <b>durability</b> | <b>conformability</b> |
|---------------------|-----------------|----------------------|---------------------|--------------------|-------------------|-----------------------|
| Hydrogel electrodes | Good            | Good                 | Good                | Easy               | Good              | Good                  |
| Metal electrodes    | Bad             | Bad                  | No                  | Hard               | Bad               | Bad                   |

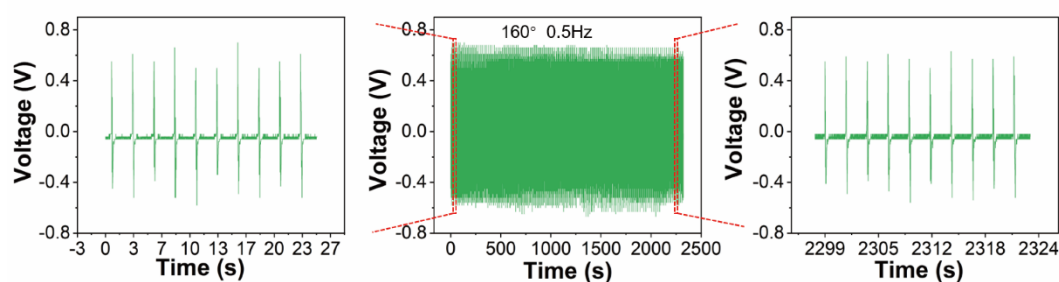

**Figure S1.** Durability property of TSB-PENG.

**Supplementary Movie S1.** The output voltage signal of PENG at bend, twist and stretch;

**Supplementary Movie S2.** The PENG can charge 4.7  $\mu\text{F}$  capacitor and drive the calculator;

**Supplementary Movie S3.** The device can transmit wireless signal to control the LED.

**Supplementary Movie S4.** The output signal of the hook pass movement is collected;

**Supplementary Movie S5.** The output signal of the shoulder pass movement is collected;

**Supplementary Movie S6.** The output signal of the chest pass movement is collected;
